# Supplementary material for: Where Things Belong: The Development of Scene Knowledge in Childhood
Source: Research Square preprint supplement (doi:10.21203/rs.3.rs-6861119/v1), 2025-06-25
Supplement: Supplementary file 1 [file f9722ff6622b838b3eb006a6.docx]

Supplementary information for

**Where Things Belong:**

**The Development of Scene Knowledge in Childhood**

Dilara Deniz Türk1,3* – [d.tuerk@psych.uni-frankfurt.de](mailto:d.tuerk@psych.uni-frankfurt.de)

Daniela Bahn2 – [daniela.bahn@uni-marburg.de](mailto:daniela.bahn@uni-marburg.de)

Christina Kauschke2– [kauschke@uni-marburg.de](mailto:kauschke@uni-marburg.de)

Melissa Le-Hoa Võ1,3 – [melissa.vo@psy.lmu.de](mailto:melissa.vo@psy.lmu.de)

1Department of Psychology, Goethe University Frankfurt, Germany

2 German Linguistics, Clinical Linguistics, University of Marburg

3 Neuro-Cognitive Psychology, Department of Psychology, Ludwig-Maximilians-University Munich

*Correspondence concerning this article should be addressed to Dilara Deniz Türk, Department of Psychology, Goethe University Frankfurt, Theodor-W.-AdornoPlatz 6, 60323 Frankfurt am Main, Germany. Email: [d.tuerk@psych.uni-frankfurt.de](mailto:d.tuerk@psych.uni-frankfurt.de)

**Supplementary Information 1**

| **Table S1.1**  GLMM of refixation count with violation type, age, visual development test scores as predictors *(free viewing task)* | | | | |
| --- | --- | --- | --- | --- |
|  | GLMM | | | |
| Fixed Effects | Estimate | SE | z Value | *p* Value |
| Intercept (log scale) | 0.767 | 0.174 | 4.411 | < .001*** |
| Violation Type (Con) | -0.025 | 0.04 | -0.632 | .527 |
| Violation Type (Sem) | 0.016 | 0.04 | 0.404 | .686 |
| Age | 0.015 | 0.02 | 0.760 | .447 |
| Visual Development Test  (scaled FEW -3) | 0.01 | 0.031 | 0.322 | .748 |

| **Table S1.2**  Descriptives of decision time (ms) by violation type *(visual search task)* | | | | |
| --- | --- | --- | --- | --- |
| Target Location | *M* | *SD* | *Min* | *Max* |
| Expected | 4496 | 5961 | 41 | 38108 |
| Unexpected | 4642 | 5943 | 115 | 43244 |

| **Table S1.3**  GLMM of decision time (ms) with age and visual development test scores predictors, target location as fixed factor *(visual search task)* | | | | |
| --- | --- | --- | --- | --- |
|  | GLMM | | | |
| Fixed Effects | Estimate | SE | *z* Value | *p* Value |
| Mean log Decision Time | 8.620 | 0.566 | 15.218 | < .001 |
| Target Location | -0.072 | 0.329 | -0.218 | .827 |
| Age | -0.062 | 0.067 | -0.921 | .357 |
| Target Location x Age | 0.014 | 0.039 | 0.371 | .711 |
| Visual Development Test  (FEW -3) | 0.062 | 0.115 | 0.540 | .589 |

| **Table S1.4**  GLMM of search accuracy, target location as fixed factor *(visual search task)* | | | | |
| --- | --- | --- | --- | --- |
|  | GLMM | | | |
| Fixed Effects | Estimate | *SE* | *z* Value | *p* Value |
| Intercept | 0.814 | 0.216 | 3.766 | < .001*** |
| Target Location | -0.164 | 0.146 | -1.125 | .26 |

| **Table S1.5**  GLMM of reaction time (ms) on only during correct trials, target location as fixed factor *(visual search task)* | | | | |
| --- | --- | --- | --- | --- |
|  | GLMM | | | |
| Fixed Effects | Estimate | *SE* | *z* Value | *p* Value |
| Intercept | 7.994 | 0.105 | 76.130 | < .001*** |
| Target Location | 0.133 | 0.045 | 2.935 | .003** |

**Supplementary Information 2**

**Objects in Dollhouse Task**

| **Objects** | **Scene** | **Object Type**  ***(Anchor vs. Local)*** |
| --- | --- | --- |
| Bath rug | | Bathroom | | --- | | Bedroom | | Kitchen | | Living Room | | Local |
| Towel1 | | Bathroom | | --- | | Bedroom | | Kitchen | | Bathroom | | Local |
| Shower | Bathroom | Anchor |
| Sink | Bathroom | Anchor |
| Soap | | Kitchen | | --- | | Bathroom | | Local |
| Toilet | Bathroom | Anchor |
| Toilet rug | | Bathroom | | --- | | Kitchen | | Local |
| Toothbrush | Bathroom | Local |
| Toilet paper holder | Bathroom | Local |
| Towel 2 | | Bathroom | | --- | | Bedroom | | Kitchen | | Living Room | | Local |
| Armchair | Living Room | Local |
| Corner shelf1 | | Bathroom | | --- | | Bedroom | | Living Room | | Local |
| Cornershelf2 | | Bathroom | | --- | | Bedroom | | Living Room | | Local |
| Couch | Living Room | Anchor |
| Plant | | Living Room | | --- | | Kitchen | | Bathroom | | Bedroom | | Local |
| Shelf1 | | Kitchen | | --- | | Living Room | | - |
| Side table (coffee table) | Living Room | Anchor |
| Couch pillow | | Living Room | | --- | | Bedroom | | Local |
| Baby bed | Bedroom | Anchor |
| Baby blanket | Bedroom | Local |
| Baby pillow | Bedroom | Local |
| Bed | Bedroom | Anchor |
| Blanket | Bedroom | Local |
| Closet | Bedroom | Anchor |
| Nighstand1 | | Bedroom | | --- | | Living Room | | Kitchen | | Local |
| Nightstand2 | | Bedroom | | --- | | Living Room | | Kitchen | | Local |
| Pillow1 | Bedroom | Local |
| Pillow2 | Bedroom | Local |
| Baby chair | Kitchen | Local |
| Bread | Kitchen | Local |
| Butter | Kitchen | Local |
| Chair1 | Kitchen | Local |
| Chair2 | Kitchen | Local |
| Cheese | Kitchen | Local |
| Corner shelf1 | Kitchen | - |
| Cup | | Kitchen | | --- | | Living Room | | Local |
| Dining table | Kitchen | Anchor |
| Dinner set | Kitchen | Local |
| Fridge | Kitchen | Anchor |
| Iron | | Bedroom | | --- | | Living Room | | Local |
| Iron board | | Bedroom | | --- | | Living Room | | Local |
| Jam jar | Kitchen | Local |
| Jug | | Kitchen | | --- | | Living Room | | Local |
| Ketchup | Kitchen | Local |
| Pot1 | Kitchen | Local |
| Pot2 | Kitchen | Local |
| Pudding | Kitchen | Local |
| Shelf | | Kitchen | | --- | | Bedroom | | Living Room | | - |
| Kitchen Sink | Kitchen | Anchor |
| Stove | Kitchen | Anchor |
| Sugar bowl | | Kitchen | | --- | | Living Room | | Local |
| Teapot | | Kitchen | | --- | | Living Room | | Local |
| Trash can1 | | Bathroom | | --- | | Kitchen | | Local |
| Trash can2 | | Bathroom | | --- | | Kitchen | | Local |
| Vacuum cleaner | | Bathroom | | --- | | Bedroom | | Kitchen | | Living Room | | Local |
| Backpack | | Bedroom | | --- | | Living Room | | - |
| Book | | Bedroom | | --- | | Living Room | | Local |
| Chair1 | Kitchen | Local |
| Chair2 | Kitchen | Local |
| Desk | | Kitchen | | --- | | Living Room | | - |
| Paper cone for school age children | | Bedroom | | --- | | Living Room | | Local |

**Supplementary Information 3**

**Model Results Before Excluding Repeated Scenes**

| **Table S3.1**  GLMM of dwell time (ms) with violation type, age, visual development test scores as predictors | | | | |
| --- | --- | --- | --- | --- |
|  | GLMM | | | |
| Fixed Effects | Estimate | *SE* | *z* Value | *p* Value |
| Intercept (log scale) | 7.365 | 0.227 | 32.481 | < .001*** |
| Violation Type (Con) | -0.126 | 0.042 | -2.981 | .003** |
| Violation Type (Sem) | -0.002 | 0.042 | -0.05 | .960 |
| Age | 0.003 | 0.026 | 0.133 | .894 |
| Visual Development Test  (scaled FEW -3) | 0.063 | 0.041 | 1.523 | .128 |

| **Table S3.2**  GLMM of dwell time (ms) on semantic violations with semantic dollhouse performance and visual development test scores as predictors | | | | |
| --- | --- | --- | --- | --- |
|  | GLMM | | | |
| Fixed Effects | Estimate | *SE* | *z* Value | *p* Value |
| Intercept (log scale) | 8.163 | 0.705 | 11.579 | < .001*** |
| Dollhouse Semantics | -0.762 | 0.830 | -0.918 | .358 |
| Visual Development Test  (scaled FEW -3) | 0.077 | 0.057 | 1.342 | .180 |

| **Table S3.3**  GLMM of dwell time (ms) on syntactic violations with mean distance in dollhouse task and visual development test scores as predictors | | | | |
| --- | --- | --- | --- | --- |
|  | GLMM | | | |
| Fixed Effects | Estimate | *SE* | *z* Value | *p* Value |
| Intercept (log scale) | 7.397 | 0.084 | 88.151 | < .001*** |
| Dollhouse Syntax (Mean Distance) | -0.069 | 0.05 | -1.386 | .166 |
| Visual Development Test  (scaled FEW -3) | 0.03 | 0.051 | 0.595 | .552 |
| **Table S3.4**  LM of dwell time (ms) on semantically inconsistent targets minus consistent targets as predictors, age as fixed factor | | | | |
|  | GLMM | | | |
| Fixed Effects | Estimate | *SE* | *t* Value | *p* Value |
| Intercept | -682.93 | 619.77 | -1.102 | .279 |
| Age | 136.69 | 73.62 | 1.857 | .072 |
|  |  |  |  |  |
| **Table S3.5**  LM of dwell time (ms) on syntactically inconsistent targets minus consistent targets as predictors, age as fixed factor | | | | |
|  | GLMM | | | |
| Fixed Effects | Estimate | *SE* | *t* Value | *p* Value |
| Intercept | -585.13 | 507.65 | -1.153 | .258 |
| Age | 91.77 | 60.30 | 1.522 | .138 |

**Supplementary Information 4**

| **Table S4.1**  GLMM of dwell time (ms) with violation type, age, visual development test scores as predictors *(free viewing task)* | | | | |
| --- | --- | --- | --- | --- |
|  | GLMM | | | |
| Fixed Effects | Estimate | *SE* | *z* Value | *p* Value |
| Intercept (log scale) | 7.397 | 0.216 | 34.181 | < .001*** |
| Violation Type (Sem vs Con) | -0.137 | 0.06 | -2.293 | .022* |
| Violation Type (Syn vs Con) | 0.018 | 0.06 | -0.298 | .766 |
| Age | -0.005 | 0.025 | -0.199 | .842 |
| Visual Development Test  (scaled FEW -3) | 0.064 | 0.039 | 1.633 | .102 |

| **Table S4.2**  GLMM of dwell time (ms) on semantic violations with semantic dollhouse performance and visual development test scores as predictors *(free viewing task)* | | | | |
| --- | --- | --- | --- | --- |
|  | GLMM | | | |
| Fixed Effects | Estimate | *SE* | *z* Value | *p* Value |
| Intercept (log scale) | 8.257 | 0.688 | 12.000 | < .001*** |
| Dollhouse Semantics | -0.874 | 0.809 | -1.080 | .280 |
| Visual Development Test  (scaled FEW -3) | 0.094 | 0.055 | 1.719 | .086 |

| **Table S4.3**  GLMM of dwell time (ms) on syntactic violations with mean distance in dollhouse task and visual development test scores as predictors *(free viewing task)* | | | | |
| --- | --- | --- | --- | --- |
|  | GLMM | | | |
| Fixed Effects | Estimate | *SE* | *z* Value | *p* Value |
| Intercept (log scale) | 8.486 | 0.985 | 8.614 | < .001*** |
| Dollhouse Syntax (scaled Mean Distance) | -4.153 | 3.423 | -1.213 | .225 |
| Visual Development Test  (scaled FEW -3) | 0.03 | 0.061 | 0.497 | .619 |

| **Table S4.4**  GLMM of dwell time (ms) on consistent targets with age and visual development test scores as predictors *(free viewing task)* | | | | | |
| --- | --- | --- | --- | --- | --- |
|  |  | GLMM | | | |
| Violation Type | Fixed Effects | Estimate | *SE* | *z* Value | *p* Value |
| Consistent | Intercept (log scale) | 7.726 | 0.263 | 29.323 | < .001*** |
| Age | -0.66 | 0.03 | -2.188 | .028* |
| Visual Development Test  (scaled FEW -3) | 0.073 | 0.048 | 1.535 | .124 |
| Semantically Inconsistent | Intercept (log scale) | 7.166 | 0.305 | 23.517 | < .001*** |
| Age | 0.043 | 0.035 | 1.222 | .222 |
| Visual Development Test  (scaled FEW -3) | 0.097 | 0.054 | 1.799 | .072 |
| Syntactically Consistent | Intercept (log scale) | 7.109 | 0.352 | 20.213 | < .001*** |
| Age | 0.023 | 0.04 | 0.564 | .573 |
| Visual Development Test  (scaled FEW -3) | 0.028 | 0.062 | 0.446 | .655 |

| **Table S4.5**  LM of dwell time (ms) difference between semantically inconsistent and consistent targets with age as the predictor *(free viewing task)* | | | | |
| --- | --- | --- | --- | --- |
|  | GLMM | | | |
| Fixed Effects | Estimate | *SE* | *t* Value | *p* Value |
| Intercept | -970.14 | 666.47 | -1.456 | .155 |
| Age | 171.98 | 78.85 | 2.181 | .037 |

| **Table S4.6**  LM of dwell time (ms) difference between syntactically inconsistent and consistent targets with age as the predictor *(free viewing task)* | | | | |
| --- | --- | --- | --- | --- |
|  | GLMM | | | |
| Fixed Effects | Estimate | *SE* | *t* Value | *p* Value |
| Intercept | -635.96 | 524.710 | -1.212 | .235 |
| Age | 98.10 | 62.08 | 1.580 | .124 |

| **Table S4.7**  GLMM of first fixation time (ms) with target location and visual development test scores as predictors *(visual search task)* | | | | |
| --- | --- | --- | --- | --- |
|  | GLMM | | | |
| Fixed Effects | Estimate | *SE* | *z* Value | *p* Value |
| Intercept (log scale) | 7.04 | 0.098 | 71.640 | < .001*** |
| Violation Type (Incon) | 0.288 | 0.082 | 3.515 | < .001*** |
| Visual Development Test  (scaled FEW -3) | -0.065 | 0.053 | -1.238 | .216 |

| **Table S4.8**  GLMM of reaction time (ms) with target location and visual development test scores as predictors *(visual search task)* | | | | |
| --- | --- | --- | --- | --- |
|  | GLMM | | | |
| Fixed Effects | Estimate | *SE* | *z* Value | *p* Value |
| Intercept (log scale) | 8.504 | 0.13 | 65.647 | < .001*** |
| Violation Type (Incon) | 0.146 | 0.043 | 3.387 | < .001*** |
| Visual Development Test  (scaled FEW -3) | 0.001 | 0.1 | 0.013 | .99 |

| **Table S4.9**  GLMM of first fixation time (ms) with mean distance as predictor, split by target location (expected vs. unexpected) | | | | | |
| --- | --- | --- | --- | --- | --- |
|  |  | GLMM | | | |
| Target Location | Fixed Effects | Estimate | *SE* | *z* Value | *p* Value |
| Expected | Intercept (log scale) | 6.734 | 0.088 | 76.805 | < .001*** |
| Mean Distance (Scaled) | 0.037 | 0.034 | 1.108 | .268 |
| Unexpected | Intercept (log scale) | 7.169 | 0.104 | 68.81 | < .001*** |
| Mean Distance (Scaled) | -0.023 | 0.044 | -0.52 | .603 |
| **Table S4.10**  GLMM of reaction time (ms) with mean distance as predictor, split by target location (expected vs. unexpected) *(visual search task)* | | | | | |
|  |  | GLMM | | | |
| Target Location | Fixed Effects | Estimate | *SE* | *z* Value | *p* Value |
| Expected | Intercept (log scale) | 8.532 | 0.065 | 131.484 | < .001*** |
| Mean Distance (Scaled) | 0.022 | 0.036 | 0.606 | .545 |
| Unexpected | Intercept (log scale) | 8.672 | 0.069 | 126.02 | < .001*** |
| Mean Distance (Scaled) | -0.039 | 0.035 | -1.13 | .258 |

| **Table S4.11**  GLMM of first fixation time (msec) with age as predictor, split by target location (expected vs. unexpected) *(visual search task)* | | | | | |
| --- | --- | --- | --- | --- | --- |
|  |  | GLMM | | | |
| Target Location | Fixed Effects | Estimate | *SE* | *z* Value | *p* Value |
| Expected | Intercept (log scale) | 6.728 | 0.086 | 78.07 | < .001*** |
|  | Age | -0.125 | 0.034 | -3.646 | < .001*** |
| Unexpected | Intercept (log scale) | 6.166 | 0.105 | 67.722 | < .001*** |
|  | Age | -0.09 | 0.042 | -2.124 | .034* |

| **Table S4.12**  GLMM of reaction time (msec) with age as predictor, split by target location (expected vs. unexpected) *(visual search task)* | | | | | |
| --- | --- | --- | --- | --- | --- |
|  |  | GLMM | | | |
| Target Location | Fixed Effects | Estimate | *SE* | *z* Value | *p* Value |
| Expected | Intercept (log scale) | 8.521 | 0.065 | 131.794 | < .001*** |
|  | Age | -0.162 | 0.035 | -4.634 | < .001*** |
| Unexpected | Intercept (log scale) | 8.664 | 0.072 | 120.417 | < .001*** |
|  | Age | -0.154 | 0.034 | -4.514 | < .001*** |
